# Supplementary material for: The Use of Protein-Protein Interactions for the Analysis of the Associations between PM2.5 and Some Diseases
Source: Hindawi journal article supplement (doi:10.1155/2016/4895476), 2016-01-01
Supplement: f1 [file 4895476.f1.zip]

**Supplementary Material III.** Maximum interaction score and permutation FDR for each disease gene

1. Genes related to bone

| Gene      | Maximum interaction score | Permutation FDR |
|-----------|---------------------------|-----------------|
| LRP5      | 998                       | 0.024           |
| COL2A1    | 990                       | 0.028           |
| GNAS      | 966                       | 0.054           |
| COMP      | 952                       | 0.04            |
| COL1A2    | 930                       | 0.316           |
| COL1A1    | 927                       | 0.322           |
| CALCR     | 908                       | 0.193           |
| VDR       | 904                       | 0.301           |
| EIF2AK3   | 897                       | 0.071           |
| TNFRSF11B | 834                       | 0.086           |
| TNFRSF11A | 804                       | 0.241           |
| ALPL      | 779                       | 0.182           |
| COL9A2    | 696                       | 0.084           |
| ANKH      | 690                       | 0.129           |
| DSPP      | 673                       | 0.275           |
| TREM2     | 621                       | 0.113           |

|         |     |       |
|---------|-----|-------|
| SQSTM1  | 619 | 0.451 |
| FGF23   | 601 | 0.35  |
| COL9A3  | 541 | 0.143 |
| TCIRG1  | 541 | 0.348 |
| WISP3   | 488 | 0.136 |
| KL      | 488 | 0.46  |
| AMELX   | 458 | 0.398 |
| TYROBP  | 437 | 0.735 |
| MATN3   | 408 | 0.31  |
| EXT1    | 404 | 0.458 |
| SLC26A2 | 353 | 0.368 |
| LEMD3   | 330 | 0.528 |
| COL11A2 | 294 | 0.063 |
| EXT2    | 266 | 0.666 |
| CYP2R1  | 262 | 0.362 |
| GALNT3  | 246 | 0.43  |
| KLK4    | 154 | 0.732 |
| ANO5    | 0   | 1     |
| ENAM    | 0   | 1     |

## 2. Genes related to cancer

| Gene   | Maximum interaction score | Permutation FDR |
|--------|---------------------------|-----------------|
| IRF1   | 999                       | 0.005           |
| CDH1   | 999                       | 0.047           |
| AXIN1  | 999                       | 0.051           |
| EP300  | 999                       | 0.125           |
| EGFR   | 999                       | 0.14            |
| PTPN11 | 999                       | 0.098           |
| CTNNB1 | 999                       | 0.2             |
| AR     | 999                       | 0.073           |
| JAK2   | 999                       | 0.116           |
| ESR1   | 998                       | 0.138           |
| VHL    | 998                       | 0.052           |
| IL1B   | 997                       | 0.077           |
| AKT1   | 997                       | 0.221           |
| SMAD4  | 997                       | 0.068           |
| TP53   | 995                       | 0.6             |
| MYC    | 994                       | 0.295           |
| CCND1  | 992                       | 0.161           |
| HRAS   | 992                       | 0.125           |
| RB1    | 991                       | 0.232           |

|         |     |       |
|---------|-----|-------|
| PLA2G2A | 989 | 0.011 |
| PARK2   | 985 | 0.069 |
| FGFR3   | 983 | 0.099 |
| WT1     | 983 | 0.044 |
| TLR4    | 983 | 0.147 |
| TLR2    | 982 | 0.119 |
| MET     | 981 | 0.098 |
| APC     | 976 | 0.131 |
| PDGFRB  | 976 | 0.23  |
| KIT     | 971 | 0.123 |
| KDR     | 966 | 0.225 |
| ERBB2   | 966 | 0.283 |
| BAX     | 962 | 0.208 |
| IGF2R   | 962 | 0.06  |
| KRAS    | 960 | 0.179 |
| RUNX1   | 958 | 0.194 |
| PDGFB   | 958 | 0.07  |
| NTRK1   | 955 | 0.212 |
| IL1RN   | 954 | 0.118 |
| BACH1   | 954 | 0.02  |

|          |     |       |
|----------|-----|-------|
| NME1     | 953 | 0.052 |
| PTEN     | 953 | 0.26  |
| TGFBR2   | 948 | 0.189 |
| HNF1B    | 947 | 0.044 |
| NF1      | 947 | 0.085 |
| RET      | 932 | 0.284 |
| BRCA1    | 932 | 0.518 |
| PRKAR1A  | 925 | 0.055 |
| AXIN2    | 920 | 0.096 |
| BRCA2    | 920 | 0.255 |
| CYP2A6   | 917 | 0.209 |
| TERT     | 916 | 0.369 |
| MAX      | 913 | 0.249 |
| PAX7     | 903 | 0.077 |
| MSH2     | 899 | 0.191 |
| PIK3CA   | 899 | 0.859 |
| ZFHX3    | 899 | 0.285 |
| ARHGAP26 | 899 | 0.12  |
| BCR      | 899 | 0.422 |
| GMPS     | 899 | 0.396 |

|        |     |       |
|--------|-----|-------|
| MAP3K8 | 896 | 0.095 |
| MCC    | 895 | 0.016 |
| NRAS   | 891 | 0.486 |
| CASP8  | 889 | 0.389 |
| AURKA  | 883 | 0.634 |
| TSG101 | 878 | 0.176 |
| PTPN12 | 877 | 0.116 |
| GDNF   | 863 | 0.383 |
| ETV6   | 857 | 0.157 |
| STK11  | 856 | 0.348 |
| CDKN2A | 855 | 0.48  |
| MLH1   | 852 | 0.267 |
| GATA1  | 846 | 0.426 |
| BRAF   | 845 | 0.381 |
| HMMR   | 838 | 0.341 |
| IRF4   | 837 | 0.243 |
| HNF1A  | 836 | 0.349 |
| NPM1   | 827 | 0.508 |
| GATA2  | 826 | 0.222 |
| RASSF1 | 826 | 0.224 |

|          |     |       |
|----------|-----|-------|
| ARHGEF12 | 822 | 0.184 |
| GPC3     | 816 | 0.101 |
| NUP214   | 812 | 0.526 |
| PAX3     | 800 | 0.384 |
| CD82     | 791 | 0.232 |
| ODC1     | 786 | 0.268 |
| MUTYH    | 784 | 0.084 |
| NCOA4    | 776 | 0.131 |
| MSR1     | 767 | 0.16  |
| FLT3     | 764 | 0.412 |
| NQO2     | 744 | 0.035 |
| OGG1     | 736 | 0.304 |
| XRCC3    | 718 | 0.262 |
| ATM      | 714 | 0.492 |
| FLCN     | 714 | 0.106 |
| KLF6     | 714 | 0.119 |
| LIG4     | 706 | 0.31  |
| WWOX     | 706 | 0.156 |
| RNASEL   | 698 | 0.097 |
| PTPRJ    | 682 | 0.144 |

|         |     |       |
|---------|-----|-------|
| PLAG1   | 677 | 0.167 |
| RASA1   | 645 | 0.611 |
| PDGFRL  | 625 | 0.139 |
| PDGFRA  | 612 | 0.746 |
| DLC1    | 605 | 0.257 |
| NF2     | 603 | 0.481 |
| SDHC    | 589 | 0.313 |
| DLEC1   | 571 | 0.351 |
| SMARCE1 | 563 | 0.408 |
| CHIC2   | 556 | 0.136 |
| MLF1    | 550 | 0.238 |
| SDHB    | 548 | 0.631 |
| RAD54L  | 546 | 0.156 |
| PCM1    | 538 | 0.284 |
| CBFB    | 511 | 0.416 |
| PTCH2   | 507 | 0.389 |
| PTCH1   | 497 | 0.638 |
| BUB1B   | 489 | 0.914 |
| CASP10  | 481 | 0.592 |
| FLT4    | 473 | 0.562 |



|         |     |       |
|---------|-----|-------|
| ANTXR1  | 470 | 0.218 |
| MXI1    | 460 | 0.492 |
| SUFU    | 457 | 0.636 |
| LZTS1   | 424 | 0.545 |
| TRIM24  | 419 | 0.513 |
| MAD1L1  | 419 | 0.787 |
| SH3GL1  | 417 | 0.498 |
| PPP2R1B | 413 | 0.64  |
| BARD1   | 411 | 0.767 |
| IDH1    | 409 | 0.698 |
| EXT1    | 404 | 0.458 |
| MSH6    | 403 | 0.834 |
| RB1CC1  | 401 | 0.652 |
| ERCC6   | 391 | 0.477 |
| PRCC    | 385 | 0.385 |
| HIP1    | 384 | 0.675 |
| PALB2   | 383 | 0.45  |
| RNF6    | 374 | 0.306 |
| DIRC2   | 364 | 0.405 |
| BRIP1   | 363 | 0.527 |

|         |     |       |
|---------|-----|-------|
| PPM1D   | 350 | 0.77  |
| CHEK2   | 342 | 0.97  |
| CCDC6   | 333 | 0.55  |
| SDHD    | 333 | 0.87  |
| KIF1B   | 329 | 0.709 |
| FH      | 328 | 0.868 |
| MLH3    | 312 | 0.67  |
| ASPSCR1 | 309 | 0.73  |
| SH2D1A  | 294 | 0.791 |
| DCC     | 291 | 0.712 |
| TACC3   | 286 | 0.826 |
| BLM     | 286 | 0.857 |
| RNF139  | 272 | 0.75  |
| WHSC1L1 | 257 | 0.438 |
| MN1     | 247 | 0.623 |
| PHB     | 246 | 0.965 |
| PMS2    | 218 | 0.804 |
| CDS1    | 212 | 0.409 |
| LPP     | 188 | 0.776 |
| ATR     | 159 | 0.988 |

|         |   |   |
|---------|---|---|
| GOLGA5  | 0 | 1 |
| TMEM127 | 0 | 1 |
| FEZ1    | 0 | 1 |
| RAD54B  | 0 | 1 |
| TRIM33  | 0 | 1 |
| MINPP1  | 0 | 1 |
| COL4A6  | 0 | 1 |

### 3. Genes related to cardiovascular

| Gene   | Maximum interaction score | Permutation FDR |
|--------|---------------------------|-----------------|
| BMPR2  | 999                       | 0.039           |
| DSP    | 999                       | 0.009           |
| IL6    | 999                       | 0.042           |
| PPARG  | 999                       | 0.017           |
| ESR1   | 998                       | 0.138           |
| F2     | 998                       | 0.076           |
| F5     | 998                       | 0.036           |
| TCF7L2 | 997                       | 0.029           |
| EPHX1  | 995                       | 0.012           |
| TCF4   | 994                       | 0.028           |
| ELN    | 993                       | 0.033           |

|         |     |       |
|---------|-----|-------|
| PKP2    | 984 | 0.024 |
| NOTCH3  | 983 | 0.065 |
| NKX2-5  | 978 | 0.052 |
| GATA4   | 977 | 0.051 |
| PTGIS   | 977 | 0.011 |
| F13A1   | 970 | 0.037 |
| HNF4A   | 963 | 0.125 |
| NOS3    | 963 | 0.16  |
| HGF     | 961 | 0.106 |
| GHR     | 959 | 0.118 |
| LDLR    | 958 | 0.09  |
| GJA1    | 953 | 0.097 |
| NR3C2   | 953 | 0.029 |
| PNMT    | 952 | 0.04  |
| KCNQ1   | 951 | 0.138 |
| MYH7    | 948 | 0.076 |
| HNF1B   | 947 | 0.044 |
| NOS2    | 947 | 0.096 |
| OLR1    | 944 | 0.018 |
| NEUROD1 | 939 | 0.035 |

|         |     |       |
|---------|-----|-------|
| CYP3A5  | 934 | 0.103 |
| AGTR1   | 928 | 0.094 |
| PRKAR1A | 925 | 0.055 |
| MEF2A   | 923 | 0.126 |
| GNAI2   | 918 | 0.399 |
| TPM1    | 918 | 0.292 |
| APOA2   | 910 | 0.168 |
| GCGR    | 907 | 0.157 |
| SELE    | 907 | 0.089 |
| ADRB1   | 901 | 0.191 |
| DES     | 901 | 0.338 |
| HMGA1   | 899 | 0.31  |
| LMNA    | 899 | 0.501 |
| MTNR1B  | 899 | 0.666 |
| TNNI3   | 880 | 0.262 |
| GCLC    | 872 | 0.146 |
| IRS1    | 866 | 0.565 |
| CAV3    | 863 | 0.188 |
| TNFSF4  | 859 | 0.042 |
| GCLM    | 855 | 0.135 |

|          |     |       |
|----------|-----|-------|
| KRIT1    | 854 | 0.412 |
| PTPN1    | 852 | 0.386 |
| PRKAG2   | 837 | 0.18  |
| HNF1A    | 836 | 0.349 |
| SCN5A    | 836 | 0.121 |
| SLC6A2   | 834 | 0.05  |
| NAT1     | 832 | 0.081 |
| GCK      | 829 | 0.272 |
| MAPK8IP1 | 826 | 0.188 |
| GATA6    | 823 | 0.181 |
| SLC2A4   | 810 | 0.527 |
| IRS2     | 802 | 0.497 |
| AKT2     | 800 | 0.543 |
| ENG      | 800 | 0.267 |
| RETN     | 800 | 0.193 |
| TCAP     | 800 | 0.301 |
| WFS1     | 787 | 0.333 |
| LIPH     | 786 | 0.089 |
| MYBPC3   | 786 | 0.279 |
| EPHX2    | 784 | 0.071 |

|         |     |       |
|---------|-----|-------|
| GPD2    | 783 | 0.189 |
| LIPC    | 778 | 0.38  |
| GIP     | 776 | 0.14  |
| ALOX5AP | 770 | 0.095 |
| JAG1    | 754 | 0.292 |
| ANK2    | 750 | 0.211 |
| ZFPM2   | 750 | 0.126 |
| CDKAL1  | 748 | 0.138 |
| DMD     | 747 | 0.575 |
| ABCC8   | 708 | 0.29  |
| ITIH4   | 694 | 0.164 |
| TEK     | 681 | 0.35  |
| AGT     | 664 | 0.317 |
| ATP1B1  | 661 | 0.098 |
| KCNJ11  | 655 | 0.398 |
| NET1    | 647 | 0.107 |
| RASA1   | 645 | 0.611 |
| PDE4D   | 624 | 0.462 |
| ADD1    | 619 | 0.475 |
| KCNJ2   | 612 | 0.34  |

|         |     |       |
|---------|-----|-------|
| PAX4    | 609 | 0.227 |
| LRP8    | 599 | 0.468 |
| RYR2    | 593 | 0.394 |
| GDF1    | 582 | 0.173 |
| RGS5    | 577 | 0.243 |
| LTA     | 561 | 0.646 |
| ABCA1   | 556 | 0.671 |
| PSMA6   | 530 | 0.695 |
| PRKCH   | 525 | 0.354 |
| MYL2    | 447 | 0.606 |
| GNB3    | 411 | 0.607 |
| IGF2BP2 | 407 | 0.431 |
| ENPP1   | 386 | 0.671 |
| CSRP3   | 380 | 0.606 |
| TBX1    | 364 | 0.474 |
| FH      | 328 | 0.868 |
| EYA4    | 323 | 0.385 |
| ECE1    | 319 | 0.506 |
| KCNMB1  | 302 | 0.608 |
| ABCC9   | 294 | 0.504 |



|        |     |       |
|--------|-----|-------|
| F7     | 294 | 0.52  |
| SGCD   | 291 | 0.701 |
| SCO2   | 262 | 0.704 |
| MYL3   | 246 | 0.79  |
| DTNA   | 234 | 0.704 |
| LGALS2 | 199 | 0.47  |
| MYLK2  | 183 | 0.666 |
| CFC1   | 0   | 1     |
| NKX2-6 | 0   | 1     |

#### 4. Genes related to connective tissue disorder

| Gene   | Maximum interaction score | Permutation FDR |
|--------|---------------------------|-----------------|
| IL6    | 999                       | 0.042           |
| ELN    | 993                       | 0.033           |
| IL10   | 982                       | 0.119           |
| SCT    | 979                       | 0.07            |
| HGF    | 961                       | 0.106           |
| COL1A2 | 930                       | 0.316           |
| COL1A1 | 927                       | 0.322           |
| TGFBR1 | 907                       | 0.334           |
| ANTXR2 | 905                       | 0.007           |

|          |     |       |
|----------|-----|-------|
| HLA-DRB1 | 899 | 0.283 |
| SOS1     | 899 | 0.717 |
| FGFR2    | 878 | 0.33  |
| PTPN22   | 868 | 0.063 |
| FRZB     | 825 | 0.077 |
| CD244    | 786 | 0.141 |
| MIF      | 724 | 0.192 |
| PADI4    | 708 | 0.194 |
| ANKH     | 690 | 0.129 |
| B4GALT7  | 651 | 0.066 |
| FBN1     | 633 | 0.319 |
| ADAMTS2  | 567 | 0.144 |
| COL3A1   | 565 | 0.629 |
| PLOD1    | 497 | 0.425 |
| KRT13    | 491 | 0.194 |
| KRT4     | 491 | 0.402 |
| FBLN5    | 486 | 0.183 |
| COL5A1   | 462 | 0.616 |
| GNPAT    | 460 | 0.342 |
| SLC22A4  | 436 | 0.504 |

|          |     |       |
|----------|-----|-------|
| COL5A2   | 435 | 0.613 |
| NFKBIL1  | 407 | 0.453 |
| ENPP1    | 386 | 0.671 |
| ASPN     | 374 | 0.473 |
| XYLT2    | 368 | 0.252 |
| SLC26A2  | 353 | 0.368 |
| HLA-B    | 334 | 0.617 |
| ARSE     | 321 | 0.349 |
| XYLT1    | 310 | 0.297 |
| ADAMTS10 | 308 | 0.079 |
| COL6A1   | 304 | 0.661 |
| FLNB     | 296 | 0.634 |
| COL11A2  | 294 | 0.063 |
| ABCC6    | 241 | 0.703 |
| EBP      | 168 | 0.821 |
| SMARCAL1 | 0   | 1     |
| TNXB     | 0   | 1     |

#### 5. Genes related to dermatological

| Gene | Maximum interaction score | Permutation FDR |
|------|---------------------------|-----------------|
| DSP  | 999                       | 0.009           |

|         |     |       |
|---------|-----|-------|
| DSG1    | 996 | 0.009 |
| MMP1    | 995 | 0.032 |
| EDAR    | 993 | 0.023 |
| EDA     | 965 | 0.034 |
| ALOX12B | 964 | 0.009 |
| SLURP1  | 945 | 0.009 |
| IKBKG   | 940 | 0.373 |
| KRT5    | 918 | 0.079 |
| CYLD    | 916 | 0.08  |
| KRT16   | 916 | 0.078 |
| KRT10   | 914 | 0.048 |
| KRT14   | 914 | 0.108 |
| KRT9    | 913 | 0.014 |
| ERCC3   | 909 | 0.339 |
| KRT2    | 905 | 0.095 |
| KRT1    | 904 | 0.115 |
| KRT6A   | 901 | 0.141 |
| KRT86   | 900 | 0.13  |
| ERCC2   | 899 | 0.647 |
| ERCC5   | 899 | 0.528 |

|         |     |       |
|---------|-----|-------|
| HLA-C   | 899 | 0.389 |
| LMNA    | 899 | 0.501 |
| PKP1    | 899 | 0.226 |
| PLEC    | 886 | 0.099 |
| SAT1    | 854 | 0.094 |
| PVRL1   | 819 | 0.234 |
| TGM1    | 817 | 0.095 |
| RAB27A  | 808 | 0.216 |
| TYR     | 803 | 0.228 |
| GJB2    | 766 | 0.124 |
| NOD2    | 747 | 0.378 |
| CDSN    | 734 | 0.083 |
| FLCN    | 714 | 0.106 |
| ERCC4   | 643 | 0.44  |
| GJB6    | 632 | 0.163 |
| SOX18   | 616 | 0.175 |
| ITGA6   | 611 | 0.736 |
| PSTPIP1 | 605 | 0.223 |
| MLPH    | 587 | 0.232 |
| CDH3    | 578 | 0.141 |

|          |     |       |
|----------|-----|-------|
| DSG4     | 569 | 0.123 |
| LTA      | 561 | 0.646 |
| DDB2     | 536 | 0.424 |
| ITGB4    | 522 | 0.784 |
| KRT17    | 480 | 0.249 |
| SPINK5   | 480 | 0.315 |
| GJB3     | 473 | 0.247 |
| LAMB3    | 452 | 0.534 |
| MYO5A    | 443 | 0.406 |
| HLA-A    | 424 | 0.294 |
| KRT81    | 390 | 0.25  |
| ADAR     | 382 | 0.437 |
| ABCA12   | 379 | 0.276 |
| LAMA3    | 365 | 0.58  |
| LAMC2    | 361 | 0.512 |
| ZMPSTE24 | 348 | 0.718 |
| ATP2C1   | 335 | 0.415 |
| COL17A1  | 334 | 0.542 |
| HLA-B    | 334 | 0.617 |
| MBTPS2   | 313 | 0.436 |

|         |     |       |
|---------|-----|-------|
| MPLKIP  | 301 | 0.254 |
| KRT6B   | 293 | 0.448 |
| COL7A1  | 281 | 0.61  |
| TMC6    | 247 | 0.382 |
| DKC1    | 234 | 0.998 |
| SLC39A4 | 159 | 0.181 |
| TMC8    | 157 | 0.437 |
| GJB4    | 154 | 0.222 |
| HR      | 0   | 1     |
| KRT83   | 0   | 1     |
| POLH    | 0   | 1     |

#### 6. Genes related to developmental

| Gene   | Maximum interaction score | Permutation FDR |
|--------|---------------------------|-----------------|
| IGF1   | 999                       | 0.069           |
| PTPN11 | 999                       | 0.098           |
| ZEB2   | 993                       | 0.007           |
| AMH    | 985                       | 0.039           |
| NKX2-5 | 978                       | 0.052           |
| CYP1B1 | 969                       | 0.119           |
| TWIST1 | 962                       | 0.056           |

|       |     |       |
|-------|-----|-------|
| CCL2  | 961 | 0.27  |
| SHH   | 956 | 0.362 |
| VANG1 | 953 | 0.056 |
| LHCGR | 927 | 0.188 |
| INSR  | 903 | 0.438 |
| PITX2 | 899 | 0.394 |
| FGFR2 | 878 | 0.33  |
| MTHFR | 854 | 0.156 |
| GATA6 | 823 | 0.181 |
| MECP2 | 816 | 0.315 |
| AMHR2 | 810 | 0.069 |
| TBX5  | 804 | 0.177 |
| MSX1  | 804 | 0.264 |
| MKKS  | 801 | 0.13  |
| IRF6  | 800 | 0.044 |
| TNNI2 | 778 | 0.252 |
| PAX6  | 760 | 0.48  |
| EZH2  | 746 | 0.362 |
| MIF   | 724 | 0.192 |
| MTRR  | 694 | 0.19  |



|         |     |       |
|---------|-----|-------|
| NODAL   | 591 | 0.168 |
| HSD17B3 | 591 | 0.279 |
| TPM2    | 585 | 0.401 |
| GDF1    | 582 | 0.173 |
| TSC1    | 575 | 0.743 |
| CDKL5   | 524 | 0.261 |
| SIX3    | 514 | 0.492 |
| MTR     | 504 | 0.419 |
| TBX22   | 491 | 0.144 |
| TNNT3   | 443 | 0.453 |
| T       | 400 | 0.299 |
| ZIC2    | 377 | 0.519 |
| TBX1    | 364 | 0.474 |
| UBE3A   | 353 | 0.837 |
| LEMD3   | 330 | 0.528 |
| MYH3    | 308 | 0.465 |
| NIPBL   | 272 | 0.588 |
| ESCO2   | 255 | 0.643 |
| NSDHL   | 229 | 0.519 |
| TRPS1   | 221 | 0.562 |

|        |     |       |
|--------|-----|-------|
| TCOF1  | 218 | 0.697 |
| ATR    | 159 | 0.988 |
| CFC1   | 0   | 1     |
| MED13L | 0   | 1     |
| FUZ    | 0   | 1     |
| NKX2-6 | 0   | 1     |
| EZH1   | 0   | 1     |

#### 7. Genes related to ear nose throat

| Gene    | Maximum interaction score | Permutation FDR |
|---------|---------------------------|-----------------|
| MYO7A   | 951                       | 0.069           |
| MYH14   | 950                       | 0.224           |
| MYO6    | 899                       | 0.61            |
| SLC26A4 | 881                       | 0.042           |
| OTOF    | 873                       | 0.033           |
| MYO15A  | 852                       | 0.017           |
| CDH23   | 799                       | 0.087           |
| WFS1    | 787                       | 0.333           |
| TECTA   | 773                       | 0.027           |
| TMC1    | 770                       | 0.025           |
| TMIE    | 766                       | 0.014           |

|         |     |       |
|---------|-----|-------|
| GJB2    | 766 | 0.124 |
| KCNQ4   | 752 | 0.046 |
| TMPRSS3 | 728 | 0.035 |
| GRHL2   | 718 | 0.026 |
| ACTG1   | 686 | 0.601 |
| DSPP    | 673 | 0.275 |
| PCDH15  | 657 | 0.244 |
| DIAPH1  | 641 | 0.303 |
| GJB6    | 632 | 0.163 |
| COCH    | 627 | 0.126 |
| POU3F4  | 625 | 0.132 |
| MYH9    | 538 | 0.462 |
| KCNJ10  | 536 | 0.177 |
| POU4F3  | 491 | 0.264 |
| FOXI1   | 490 | 0.258 |
| USH1C   | 473 | 0.274 |
| GJB3    | 473 | 0.247 |
| OTOA    | 452 | 0.134 |
| STRC    | 427 | 0.167 |
| MYO3A   | 360 | 0.329 |

|         |     |       |
|---------|-----|-------|
| ESPN    | 338 | 0.338 |
| CTSC    | 335 | 0.673 |
| EYA4    | 323 | 0.385 |
| COL11A2 | 294 | 0.063 |
| ATP2B2  | 257 | 0.586 |
| DFNB31  | 251 | 0.526 |
| MYO1A   | 0   | 1     |

#### 8. Genes related to endocrine

| Gene   | Maximum interaction score | Permutation FDR |
|--------|---------------------------|-----------------|
| IL6    | 999                       | 0.042           |
| AIP    | 999                       | 0.01            |
| PPARG  | 999                       | 0.017           |
| AR     | 999                       | 0.073           |
| TCF7L2 | 997                       | 0.029           |
| TCF4   | 994                       | 0.028           |
| GNAS   | 966                       | 0.054           |
| GATA3  | 964                       | 0.068           |
| HNF4A  | 963                       | 0.125           |
| HGF    | 961                       | 0.106           |
| NR3C2  | 953                       | 0.029           |

|         |     |       |
|---------|-----|-------|
| FOXP3   | 951 | 0.215 |
| STAT5B  | 950 | 0.149 |
| HNF1B   | 947 | 0.044 |
| NEUROD1 | 939 | 0.035 |
| OAS1    | 931 | 0.056 |
| HESX1   | 923 | 0.027 |
| BMP15   | 922 | 0.006 |
| GCGR    | 907 | 0.157 |
| THRB    | 906 | 0.251 |
| PTH     | 902 | 0.425 |
| GNRHR   | 899 | 0.615 |
| MTNR1B  | 899 | 0.666 |
| SSTR5   | 899 | 0.668 |
| CASR    | 899 | 0.857 |
| TSHR    | 899 | 0.484 |
| HMGA1   | 899 | 0.31  |
| MC2R    | 899 | 0.408 |
| AVPR2   | 899 | 0.416 |
| FSHR    | 899 | 0.456 |
| SCNN1A  | 898 | 0.043 |

|          |     |       |
|----------|-----|-------|
| SCNN1B   | 887 | 0.077 |
| SCNN1G   | 878 | 0.077 |
| PTPN22   | 868 | 0.063 |
| IRS1     | 866 | 0.565 |
| PTPN1    | 852 | 0.386 |
| TG       | 848 | 0.146 |
| FSHB     | 845 | 0.233 |
| PAX8     | 845 | 0.127 |
| HNF1A    | 836 | 0.349 |
| GCK      | 829 | 0.272 |
| TPO      | 829 | 0.144 |
| MAPK8IP1 | 826 | 0.188 |
| DHH      | 826 | 0.084 |
| SLC5A5   | 823 | 0.129 |
| AVP      | 822 | 0.197 |
| SLC2A4   | 810 | 0.527 |
| IRS2     | 802 | 0.497 |
| RETN     | 800 | 0.193 |
| AKT2     | 800 | 0.543 |
| CTLA4    | 793 | 0.455 |

|         |     |       |
|---------|-----|-------|
| WFS1    | 787 | 0.333 |
| STAR    | 786 | 0.286 |
| LIPH    | 786 | 0.089 |
| GPD2    | 783 | 0.189 |
| LIPC    | 778 | 0.38  |
| CAPN10  | 772 | 0.046 |
| CYP11B1 | 764 | 0.209 |
| CDKAL1  | 748 | 0.138 |
| CYP17A1 | 719 | 0.395 |
| STX16   | 709 | 0.234 |
| ABCC8   | 708 | 0.29  |
| PPP1R3A | 669 | 0.308 |
| SUMO4   | 657 | 0.165 |
| KCNJ11  | 655 | 0.398 |
| PAX4    | 609 | 0.227 |
| TBX19   | 585 | 0.14  |
| CACNA1S | 535 | 0.395 |
| FOXE1   | 518 | 0.404 |
| ITPR3   | 504 | 0.516 |
| PROP1   | 480 | 0.315 |

|         |     |       |
|---------|-----|-------|
| TTF2    | 472 | 0.287 |
| TBCE    | 424 | 0.446 |
| IGF2BP2 | 407 | 0.431 |
| AQP2    | 405 | 0.55  |
| ENPP1   | 386 | 0.671 |
| SYCP3   | 276 | 0.596 |
| MRAP    | 238 | 0.803 |
| PTF1A   | 159 | 0.693 |
| FGD2    | 0   | 1     |

#### 9. Genes related to gastrointestinal

| Gene   | Maximum interaction score | Permutation FDR |
|--------|---------------------------|-----------------|
| IL6    | 999                       | 0.042           |
| EPHX1  | 995                       | 0.012           |
| UGT1A1 | 977                       | 0.026           |
| CFTR   | 966                       | 0.108           |
| HGF    | 961                       | 0.106           |
| ABCB4  | 936                       | 0.024           |
| RET    | 932                       | 0.284           |
| KRT18  | 912                       | 0.084           |
| KRT8   | 904                       | 0.16            |



|         |     |       |
|---------|-----|-------|
| BAAT    | 899 | 0.088 |
| EDNRB   | 899 | 0.668 |
| FGF10   | 884 | 0.168 |
| TJP2    | 778 | 0.312 |
| NOD2    | 747 | 0.378 |
| ATP8B1  | 694 | 0.149 |
| CIRH1A  | 692 | 0.017 |
| SLC26A3 | 641 | 0.259 |
| VPS33B  | 518 | 0.2   |
| SPINK1  | 382 | 0.455 |
| ABCB11  | 365 | 0.506 |
| PRKCSH  | 358 | 0.379 |
| PRSS1   | 294 | 0.686 |
| SEC63   | 259 | 0.583 |
| CTRC    | 190 | 0.792 |
| HSD3B7  | 0   | 1     |

#### 10. Genes related to hematological

| Gene | Maximum interaction score | Permutation FDR |
|------|---------------------------|-----------------|
| FGA  | 999                       | 0.02            |
| JAK2 | 999                       | 0.116           |

|        |     |       |
|--------|-----|-------|
| VHL    | 998 | 0.052 |
| IFNG   | 997 | 0.076 |
| FGB    | 997 | 0.018 |
| GGCX   | 990 | 0.031 |
| APOE   | 990 | 0.114 |
| TF     | 978 | 0.039 |
| ITGA2B | 976 | 0.066 |
| EPOR   | 967 | 0.15  |
| RUNX1  | 958 | 0.194 |
| CD36   | 945 | 0.11  |
| ELANE  | 943 | 0.169 |
| CYP2C9 | 942 | 0.179 |
| CYP2A6 | 917 | 0.209 |
| NT5C3A | 899 | 0.505 |
| ACHE   | 899 | 0.079 |
| GCLC   | 872 | 0.146 |
| GATA1  | 846 | 0.426 |
| LMAN1  | 844 | 0.069 |
| TPO    | 829 | 0.144 |
| THPO   | 825 | 0.211 |

|        |     |       |
|--------|-----|-------|
| CR1    | 801 | 0.201 |
| SH2B3  | 800 | 0.171 |
| VKORC1 | 786 | 0.05  |
| SLC4A1 | 778 | 0.293 |
| RPS14  | 730 | 0.713 |
| A4GALT | 726 | 0.06  |
| GP1BB  | 694 | 0.109 |
| HBB    | 681 | 0.246 |
| CP     | 651 | 0.516 |
| CPN1   | 619 | 0.125 |
| CFH    | 615 | 0.291 |
| PDGFRA | 612 | 0.746 |
| BSG    | 604 | 0.387 |
| FOXC2  | 595 | 0.41  |
| GP1BA  | 589 | 0.317 |
| AQP1   | 569 | 0.137 |
| GCNT2  | 565 | 0.397 |
| MPL    | 544 | 0.523 |
| MYH9   | 538 | 0.462 |
| CFHR1  | 526 | 0.194 |

|          |     |       |
|----------|-----|-------|
| CFHR3    | 510 | 0.167 |
| ADAMTS13 | 491 | 0.143 |
| ATRX     | 484 | 0.589 |
| ANKRD26  | 480 | 0.218 |
| FLT4     | 473 | 0.562 |
| GSS      | 470 | 0.425 |
| EPX      | 465 | 0.256 |
| CDAN1    | 436 | 0.169 |
| AQP3     | 334 | 0.541 |
| RPS19    | 323 | 0.918 |
| MASTL    | 319 | 0.172 |
| CUBN     | 274 | 0.591 |
| SLC19A2  | 273 | 0.289 |
| F9       | 266 | 0.656 |
| WAS      | 213 | 0.971 |
| GIF      | 202 | 0.57  |
| RHAG     | 202 | 0.578 |
| AMN      | 180 | 0.471 |
| GP9      | 151 | 0.793 |
| UNC13D   | 0   | 1     |

|       |   |   |
|-------|---|---|
| ABCB7 | 0 | 1 |
| LBR   | 0 | 1 |
| FHL3  | 0 | 1 |

#### 11. Genes related to immunological

| Gene     | Maximum interaction score | Permutation FDR |
|----------|---------------------------|-----------------|
| CXCR1    | 999                       | 0.022           |
| IFNGR1   | 999                       | 0.017           |
| IL6      | 999                       | 0.042           |
| STAT1    | 999                       | 0.104           |
| IFNG     | 997                       | 0.076           |
| IL12RB1  | 997                       | 0.053           |
| JAK3     | 996                       | 0.084           |
| IL12B    | 993                       | 0.093           |
| TNFRSF1A | 993                       | 0.147           |
| CXCR4    | 991                       | 0.064           |
| TAP1     | 988                       | 0.039           |
| PARK2    | 985                       | 0.069           |
| CX3CR1   | 984                       | 0.028           |
| IL10     | 982                       | 0.119           |
| TLR2     | 982                       | 0.119           |

|          |     |       |
|----------|-----|-------|
| CISH     | 968 | 0.04  |
| CXCL12   | 966 | 0.151 |
| MPO      | 966 | 0.027 |
| IL13     | 964 | 0.145 |
| CD40     | 963 | 0.289 |
| CCL2     | 961 | 0.27  |
| CD40LG   | 961 | 0.162 |
| HGF      | 961 | 0.106 |
| TLR5     | 950 | 0.045 |
| CD8A     | 939 | 0.461 |
| TIRAP    | 939 | 0.102 |
| BTK      | 922 | 0.291 |
| IFNGR2   | 922 | 0.12  |
| TLR3     | 913 | 0.332 |
| PLA2G7   | 910 | 0.137 |
| CCL11    | 909 | 0.219 |
| ITGB2    | 909 | 0.346 |
| RAC2     | 907 | 0.385 |
| HLA-C    | 899 | 0.389 |
| HLA-DRB1 | 899 | 0.283 |

|        |     |       |
|--------|-----|-------|
| IL21R  | 899 | 0.05  |
| MC3R   | 899 | 0.395 |
| MEFV   | 899 | 0.234 |
| RFXANK | 899 | 0.285 |
| CASP8  | 889 | 0.389 |
| IL4R   | 882 | 0.313 |
| AICDA  | 880 | 0.201 |
| PTPN22 | 868 | 0.063 |
| DNASE1 | 858 | 0.01  |
| FCGR2B | 837 | 0.098 |
| CEBPE  | 834 | 0.112 |
| FAS    | 824 | 0.331 |
| PTPRZ1 | 819 | 0.111 |
| SELP   | 814 | 0.326 |
| AIRE   | 800 | 0.128 |
| CCL3   | 800 | 0.216 |
| BANK1  | 780 | 0.042 |
| RAG2   | 771 | 0.262 |
| C4A    | 730 | 0.101 |
| SP110  | 716 | 0.05  |

|           |     |       |
|-----------|-----|-------|
| ATM       | 714 | 0.492 |
| NLRP3     | 712 | 0.319 |
| LIG4      | 706 | 0.31  |
| CD209     | 670 | 0.346 |
| KIR3DL1   | 578 | 0.283 |
| NCF1      | 577 | 0.446 |
| RAG1      | 561 | 0.502 |
| CYBA      | 509 | 0.382 |
| CASP10    | 481 | 0.592 |
| SPINK5    | 480 | 0.315 |
| MRE11A    | 414 | 0.772 |
| CYBB      | 405 | 0.516 |
| SLC11A1   | 377 | 0.546 |
| NCF2      | 367 | 0.685 |
| PHF11     | 360 | 0.492 |
| TNFRSF13B | 360 | 0.796 |
| RFX5      | 353 | 0.408 |
| KIR3DS1   | 352 | 0.592 |
| ICOS      | 346 | 0.768 |
| HAVCR1    | 324 | 0.702 |



|          |     |       |
|----------|-----|-------|
| SERPING1 | 310 | 0.57  |
| ADA      | 307 | 0.821 |
| UNG      | 265 | 0.838 |
| MS4A2    | 234 | 0.621 |
| WAS      | 213 | 0.971 |
| DCLRE1C  | 183 | 0.807 |
| MVK      | 160 | 0.823 |
| RFXAP    | 0   | 1     |
| TAP2     | 0   | 1     |
| TAPBP    | 0   | 1     |

## 12. Genes related to metabolic

| Gene    | Maximum interaction score | Permutation FDR |
|---------|---------------------------|-----------------|
| APOA1   | 999                       | 0.038           |
| MCCC2   | 999                       | 0.007           |
| PPARG   | 999                       | 0.017           |
| OTC     | 995                       | 0.035           |
| SLC40A1 | 993                       | 0.009           |
| GBA     | 978                       | 0.021           |
| UGT1A1  | 977                       | 0.026           |
| PCCB    | 971                       | 0.027           |

|        |     |       |
|--------|-----|-------|
| ATP7B  | 963 | 0.02  |
| SMPD1  | 962 | 0.043 |
| GHR    | 959 | 0.118 |
| LDLR   | 958 | 0.09  |
| SLC2A1 | 954 | 0.066 |
| ASS1   | 952 | 0.064 |
| GLUD1  | 952 | 0.041 |
| CTH    | 947 | 0.033 |
| ALG2   | 945 | 0.02  |
| ALG3   | 937 | 0.023 |
| DBH    | 935 | 0.071 |
| PDX1   | 932 | 0.205 |
| ASL    | 930 | 0.055 |
| IVD    | 930 | 0.027 |
| LCAT   | 929 | 0.022 |
| ECM1   | 922 | 0.014 |
| GAA    | 917 | 0.051 |
| ACADM  | 910 | 0.15  |
| APOA2  | 910 | 0.168 |
| AUH    | 910 | 0.051 |

|         |     |       |
|---------|-----|-------|
| SLC2A2  | 908 | 0.048 |
| USF1    | 900 | 0.228 |
| ADSL    | 899 | 0.318 |
| ALDH3A2 | 899 | 0.317 |
| ALDH4A1 | 899 | 0.132 |
| AMT     | 899 | 0.199 |
| HAL     | 899 | 0.146 |
| HPRT1   | 899 | 0.4   |
| LMNA    | 899 | 0.501 |
| HFE     | 884 | 0.112 |
| CAV3    | 863 | 0.188 |
| GK      | 859 | 0.062 |
| HLCS    | 854 | 0.042 |
| MTHFR   | 854 | 0.156 |
| NPC1    | 854 | 0.027 |
| PMM2    | 849 | 0.095 |
| SCD     | 842 | 0.08  |
| ABCG8   | 839 | 0.066 |
| ABCG5   | 836 | 0.065 |
| APOA5   | 836 | 0.134 |

|         |     |       |
|---------|-----|-------|
| APOB    | 836 | 0.337 |
| CYP27A1 | 833 | 0.132 |
| GCK     | 829 | 0.272 |
| CETP    | 825 | 0.11  |
| ATIC    | 821 | 0.34  |
| CYP11B2 | 820 | 0.133 |
| TFR2    | 805 | 0.101 |
| SLC5A1  | 801 | 0.06  |
| ASPA    | 800 | 0.202 |
| L2HGDH  | 800 | 0.073 |
| PRODH   | 800 | 0.132 |
| WFS1    | 787 | 0.333 |
| EPHX2   | 784 | 0.071 |
| ETFA    | 784 | 0.326 |
| FMO3    | 782 | 0.056 |
| HYAL1   | 782 | 0.03  |
| ALPL    | 779 | 0.182 |
| BTD     | 766 | 0.053 |
| DDC     | 762 | 0.338 |
| CPT1A   | 750 | 0.212 |

|         |     |       |
|---------|-----|-------|
| HEXA    | 746 | 0.195 |
| NAGS    | 736 | 0.132 |
| PHGDH   | 734 | 0.136 |
| NPC2    | 724 | 0.062 |
| ABCC8   | 708 | 0.29  |
| GYS2    | 702 | 0.302 |
| ACAT1   | 698 | 0.356 |
| ITIH4   | 694 | 0.164 |
| MTRR    | 694 | 0.19  |
| PPP1R3A | 669 | 0.308 |
| H6PD    | 663 | 0.256 |
| HMGCS2  | 657 | 0.204 |
| CP      | 651 | 0.516 |
| GNE     | 649 | 0.12  |
| ETFB    | 641 | 0.2   |
| ALG1    | 629 | 0.19  |
| DBT     | 622 | 0.332 |
| ACADVL  | 591 | 0.414 |
| GBE1    | 587 | 0.197 |
| HSD17B4 | 567 | 0.167 |

|          |     |       |
|----------|-----|-------|
| ALG6     | 563 | 0.199 |
| B4GALT1  | 563 | 0.322 |
| PCSK9    | 563 | 0.35  |
| MUT      | 562 | 0.433 |
| GNPTAB   | 561 | 0.037 |
| ABCA1    | 556 | 0.671 |
| ARG1     | 553 | 0.373 |
| ABCC2    | 542 | 0.295 |
| GNMT     | 523 | 0.283 |
| MPDU1    | 523 | 0.185 |
| PANK2    | 520 | 0.128 |
| SLC25A13 | 506 | 0.088 |
| MTR      | 504 | 0.419 |
| PCCA     | 488 | 0.332 |
| GNS      | 486 | 0.174 |
| SLC6A19  | 484 | 0.211 |
| MPI      | 483 | 0.471 |
| GSS      | 470 | 0.425 |
| OPA3     | 469 | 0.092 |
| DHCR24   | 462 | 0.374 |

|          |     |       |
|----------|-----|-------|
| SUMF1    | 455 | 0.219 |
| MADD     | 452 | 0.565 |
| SLC25A15 | 445 | 0.168 |
| MGAT2    | 443 | 0.284 |
| AGXT     | 434 | 0.505 |
| GCSH     | 433 | 0.414 |
| NAGA     | 405 | 0.364 |
| LAMP2    | 389 | 0.645 |
| MAN2B1   | 389 | 0.306 |
| NEU1     | 386 | 0.541 |
| BCKDHB   | 384 | 0.644 |
| SLC7A7   | 380 | 0.271 |
| DPAGT1   | 369 | 0.453 |
| PC       | 367 | 0.753 |
| ALG12    | 366 | 0.249 |
| GALT     | 350 | 0.566 |
| RP1      | 348 | 0.673 |
| LDLRAP1  | 341 | 0.59  |
| IDUA     | 340 | 0.579 |
| MCOLN1   | 332 | 0.376 |

|          |     |       |
|----------|-----|-------|
| ETFDH    | 328 | 0.515 |
| FH       | 328 | 0.868 |
| HGD      | 327 | 0.283 |
| FTCD     | 324 | 0.366 |
| GALK1    | 324 | 0.579 |
| TALDO1   | 324 | 0.575 |
| ETHE1    | 323 | 0.441 |
| SLC22A5  | 319 | 0.606 |
| ALG8     | 307 | 0.26  |
| LIPI     | 307 | 0.266 |
| MMAA     | 302 | 0.377 |
| ABCD1    | 301 | 0.597 |
| BCKDHA   | 291 | 0.694 |
| MMAB     | 291 | 0.471 |
| GCDH     | 288 | 0.456 |
| HSD17B10 | 285 | 0.871 |
| MCM6     | 279 | 0.835 |
| AGPAT2   | 278 | 0.696 |
| PHEX     | 269 | 0.805 |
| BSCL2    | 267 | 0.719 |



|         |     |       |
|---------|-----|-------|
| BCS1L   | 258 | 0.813 |
| PYGM    | 256 | 0.859 |
| GLDC    | 251 | 0.563 |
| ACADS   | 238 | 0.658 |
| CPT2    | 213 | 0.709 |
| SUOX    | 201 | 0.404 |
| CPS1    | 190 | 0.746 |
| MLYCD   | 182 | 0.537 |
| AMN     | 180 | 0.471 |
| XDH     | 172 | 0.863 |
| DPM1    | 168 | 1     |
| SLC17A5 | 168 | 0.762 |
| PPOX    | 160 | 0.776 |
| UROS    | 157 | 0.474 |
| HEXB    | 154 | 0.892 |
| AASS    | 0   | 1     |
| ABHD5   | 0   | 1     |
| COG7    | 0   | 1     |
| D2HGDH  | 0   | 1     |
| DMGDH   | 0   | 1     |

|         |   |   |
|---------|---|---|
| GRHPR   | 0 | 1 |
| MANBA   | 0 | 1 |
| MCCC1   | 0 | 1 |
| MOCS1   | 0 | 1 |
| OCRL    | 0 | 1 |
| PHKB    | 0 | 1 |
| RPIA    | 0 | 1 |
| SGSH    | 0 | 1 |
| SLC35C1 | 0 | 1 |

### 13. Genes related to multiple

| Gene   | Maximum interaction score | Permutation FDR |
|--------|---------------------------|-----------------|
| LIFR   | 999                       | 0.012           |
| JUP    | 999                       | 0.068           |
| PTPN11 | 999                       | 0.098           |
| DSP    | 999                       | 0.009           |
| NOG    | 998                       | 0.055           |
| KCNJ1  | 997                       | 0.01            |
| CREBBP | 995                       | 0.124           |
| HRAS   | 992                       | 0.125           |
| COL2A1 | 990                       | 0.028           |

|         |     |       |
|---------|-----|-------|
| EGR2    | 985 | 0.036 |
| WT1     | 983 | 0.044 |
| ATP7A   | 983 | 0.014 |
| SNAI2   | 978 | 0.007 |
| UGT1A1  | 977 | 0.026 |
| GNAS    | 966 | 0.054 |
| BACH1   | 954 | 0.02  |
| GFAP    | 953 | 0.059 |
| PTEN    | 953 | 0.26  |
| KCNQ1   | 951 | 0.138 |
| FOXP3   | 951 | 0.215 |
| MITF    | 948 | 0.188 |
| MYOC    | 947 | 0.015 |
| DNMT3B  | 945 | 0.068 |
| PAX2    | 939 | 0.142 |
| LOR     | 936 | 0.082 |
| MGP     | 934 | 0.036 |
| FOXL2   | 929 | 0.019 |
| WRN     | 927 | 0.155 |
| PRKAR1A | 925 | 0.055 |

|       |     |       |
|-------|-----|-------|
| HESX1 | 923 | 0.027 |
| BRCA2 | 920 | 0.255 |
| INSR  | 903 | 0.438 |
| PITX2 | 899 | 0.394 |
| MID1  | 899 | 0.243 |
| EDNRB | 899 | 0.668 |
| FGFR1 | 899 | 0.393 |
| FGFR2 | 878 | 0.33  |
| GATA1 | 846 | 0.426 |
| TBX3  | 822 | 0.069 |
| BBS2  | 816 | 0.158 |
| GPC3  | 816 | 0.101 |
| MYCN  | 815 | 0.352 |
| ZIC3  | 815 | 0.059 |
| WNT3  | 807 | 0.2   |
| TYR   | 803 | 0.228 |
| MKKS  | 801 | 0.13  |
| IRF6  | 800 | 0.044 |
| PAX3  | 800 | 0.384 |
| GRIP1 | 800 | 0.29  |

|         |     |       |
|---------|-----|-------|
| CDH23   | 799 | 0.087 |
| BBS4    | 793 | 0.164 |
| LMX1B   | 784 | 0.198 |
| GFM1    | 780 | 0.221 |
| SLC12A1 | 768 | 0.167 |
| GJB2    | 766 | 0.124 |
| SMS     | 756 | 0.143 |
| JAG1    | 754 | 0.292 |
| NOD2    | 747 | 0.378 |
| RPS6KA3 | 742 | 0.359 |
| SKI     | 729 | 0.186 |
| ROR2    | 724 | 0.105 |
| NLRP3   | 712 | 0.319 |
| LIG4    | 706 | 0.31  |
| CLDN1   | 704 | 0.275 |
| CDKN1C  | 699 | 0.438 |
| CACNA1C | 670 | 0.419 |
| FLNA    | 663 | 0.592 |
| BSND    | 663 | 0.12  |
| PCDH15  | 657 | 0.244 |

|          |     |       |
|----------|-----|-------|
| RASA1    | 645 | 0.611 |
| L1CAM    | 629 | 0.454 |
| NDUFB3   | 615 | 0.424 |
| FANCA    | 609 | 0.549 |
| BBS12    | 595 | 0.16  |
| AHI1     | 591 | 0.205 |
| TFAP2B   | 585 | 0.219 |
| BBS7     | 581 | 0.215 |
| PEX7     | 577 | 0.192 |
| TSC1     | 575 | 0.743 |
| KIAA1279 | 563 | 0.144 |
| AGPS     | 552 | 0.132 |
| NDUFV2   | 550 | 0.51  |
| MYH9     | 538 | 0.462 |
| SALL4    | 529 | 0.32  |
| TRIM32   | 510 | 0.402 |
| PTCH1    | 497 | 0.638 |
| RAB3GAP1 | 488 | 0.16  |
| ATRX     | 484 | 0.589 |
| NDUFS1   | 480 | 0.545 |

|         |     |       |
|---------|-----|-------|
| NDUFV1  | 480 | 0.622 |
| MKS1    | 477 | 0.434 |
| COL11A1 | 475 | 0.579 |
| CHD7    | 474 | 0.322 |
| USH1C   | 473 | 0.274 |
| FREM2   | 470 | 0.124 |
| HSPG2   | 452 | 0.803 |
| CEP290  | 445 | 0.676 |
| NDUFS3  | 435 | 0.792 |
| TP63    | 433 | 0.744 |
| NDN     | 430 | 0.622 |
| TBCE    | 424 | 0.446 |
| TAZ     | 417 | 0.579 |
| USH2A   | 412 | 0.43  |
| TYMP    | 401 | 0.587 |
| ERCC6   | 391 | 0.477 |
| SDS     | 389 | 0.317 |
| HOXA13  | 386 | 0.385 |
| SALL1   | 385 | 0.404 |
| ATPAF2  | 368 | 0.158 |

|          |     |       |
|----------|-----|-------|
| LAMA3    | 365 | 0.58  |
| TBX1     | 364 | 0.474 |
| BRIP1    | 363 | 0.527 |
| PRX      | 357 | 0.549 |
| BCOR     | 351 | 0.424 |
| ZMPSTE24 | 348 | 0.718 |
| MPZ      | 344 | 0.448 |
| CLCNKB   | 340 | 0.293 |
| ARX      | 339 | 0.582 |
| PMP22    | 337 | 0.63  |
| CTSC     | 335 | 0.673 |
| LEMD3    | 330 | 0.528 |
| SDHA     | 312 | 0.848 |
| POMGNT1  | 312 | 0.441 |
| HOXA11   | 307 | 0.604 |
| SEMA3E   | 302 | 0.21  |
| CRLF1    | 296 | 0.427 |
| COL11A2  | 294 | 0.063 |
| TRIM37   | 293 | 0.428 |
| NDUFS2   | 283 | 0.876 |



|         |     |       |
|---------|-----|-------|
| BBS5    | 277 | 0.43  |
| VPS13B  | 274 | 0.426 |
| FRAS1   | 272 | 0.306 |
| LYST    | 262 | 0.737 |
| COL18A1 | 260 | 0.818 |
| BCS1L   | 258 | 0.813 |
| USH1G   | 246 | 0.405 |
| HPS1    | 246 | 0.759 |
| DHCR7   | 243 | 0.848 |
| CHM     | 234 | 0.792 |
| NDUFB9  | 217 | 0.818 |
| NDUFA1  | 215 | 0.911 |
| CUL7    | 213 | 0.737 |
| AAAS    | 208 | 0.781 |
| POMT1   | 208 | 0.669 |
| DNAI1   | 190 | 0.796 |
| DGUOK   | 185 | 0.796 |
| NDUFS4  | 172 | 0.851 |
| FANCB   | 151 | 0.927 |
| BBS9    | 0   | 1     |

|         |   |   |
|---------|---|---|
| SBDS    | 0 | 1 |
| PEX1    | 0 | 1 |
| AP3B1   | 0 | 1 |
| CFC1    | 0 | 1 |
| NDUFAF1 | 0 | 1 |
| FOXRED1 | 0 | 1 |
| ERCC8   | 0 | 1 |
| DYM     | 0 | 1 |
| NDUFS6  | 0 | 1 |
| NUBPL   | 0 | 1 |
| NDUFAF2 | 0 | 1 |
| NDUFA11 | 0 | 1 |
| CLRN1   | 0 | 1 |
| RAI1    | 0 | 1 |
| NDUFAF3 | 0 | 1 |
| PHF6    | 0 | 1 |
| ARL6    | 0 | 1 |
| NDUFAF4 | 0 | 1 |
| PDZD7   | 0 | 1 |
| INPP5E  | 0 | 1 |

|         |   |   |
|---------|---|---|
| CCDC28B | 0 | 1 |
| PUS1    | 0 | 1 |
| NDUFAF5 | 0 | 1 |
| SDHAF1  | 0 | 1 |
| TTC8    | 0 | 1 |
| BBS10   | 0 | 1 |
| KIF7    | 0 | 1 |
| GPR98   | 0 | 1 |
| LCA10   | 0 | 1 |
| TMEM67  | 0 | 1 |

#### 14. Genes related to muscular

| Gene  | Maximum interaction score | Permutation FDR |
|-------|---------------------------|-----------------|
| AR    | 999                       | 0.073           |
| SMAD1 | 966                       | 0.163           |
| MYH7  | 948                       | 0.076           |
| MUSK  | 944                       | 0.105           |
| DES   | 901                       | 0.338           |
| CHRNE | 899                       | 0.028           |
| LMNA  | 899                       | 0.501           |
| CAPN3 | 893                       | 0.123           |

|        |     |       |
|--------|-----|-------|
| PLEC   | 886 | 0.099 |
| CAV3   | 863 | 0.188 |
| SGCA   | 826 | 0.17  |
| CRYAB  | 814 | 0.104 |
| TCAP   | 800 | 0.301 |
| EMD    | 800 | 0.196 |
| CHAT   | 778 | 0.395 |
| SGCB   | 760 | 0.25  |
| DMD    | 747 | 0.575 |
| ACTA1  | 726 | 0.494 |
| DNM2   | 714 | 0.653 |
| SCN4A  | 706 | 0.087 |
| SGCG   | 681 | 0.204 |
| GNE    | 649 | 0.12  |
| NEB    | 621 | 0.424 |
| VCP    | 590 | 0.67  |
| DMPK   | 532 | 0.425 |
| RYR1   | 515 | 0.563 |
| TRIM32 | 510 | 0.402 |
| SCG3   | 491 | 0.3   |

|         |     |       |
|---------|-----|-------|
| ATP2A1  | 462 | 0.331 |
| LARGE   | 413 | 0.289 |
| PABPN1  | 390 | 0.8   |
| SMN2    | 385 | 0.634 |
| VAPB    | 381 | 0.506 |
| CLCN1   | 374 | 0.414 |
| SEPN1   | 374 | 0.472 |
| CHRNA1  | 362 | 0.29  |
| COL6A3  | 354 | 0.622 |
| COL6A2  | 339 | 0.575 |
| SMN1    | 334 | 0.698 |
| LAMA2   | 331 | 0.755 |
| IGHMBP2 | 311 | 0.424 |
| COL6A1  | 304 | 0.661 |
| SGCD    | 291 | 0.701 |
| MYOT    | 270 | 0.628 |
| BSCL2   | 267 | 0.719 |
| RAPSN   | 249 | 0.642 |
| DYSF    | 249 | 0.752 |
| FKTN    | 229 | 0.681 |

|        |     |       |
|--------|-----|-------|
| MTM1   | 223 | 0.902 |
| CPT2   | 213 | 0.709 |
| POMT1  | 208 | 0.669 |
| DGUOK  | 185 | 0.796 |
| TNNT1  | 162 | 0.81  |
| MYH2   | 0   | 1     |
| CHRND  | 0   | 1     |
| CHRNA1 | 0   | 1     |
| MTMR14 | 0   | 1     |
| FKRP   | 0   | 1     |
| GARS   | 0   | 1     |

#### 15. Genes related to neurological

| Gene  | Maximum interaction score | Permutation FDR |
|-------|---------------------------|-----------------|
| APOA1 | 999                       | 0.038           |
| FGA   | 999                       | 0.02            |
| TBP   | 999                       | 0.191           |
| ESR1  | 998                       | 0.138           |
| PSEN1 | 997                       | 0.073           |
| PLAU  | 996                       | 0.032           |
| PRKCG | 995                       | 0.01            |

|        |     |       |
|--------|-----|-------|
| TNF    | 993 | 0.301 |
| APOE   | 990 | 0.114 |
| EGR2   | 985 | 0.036 |
| PARK2  | 985 | 0.069 |
| ATP7A  | 983 | 0.014 |
| GBA    | 978 | 0.021 |
| APTX   | 975 | 0.025 |
| MPO    | 966 | 0.027 |
| SMAD1  | 966 | 0.163 |
| NOS3   | 963 | 0.16  |
| GJB1   | 961 | 0.026 |
| SNCA   | 960 | 0.199 |
| DRD2   | 956 | 0.082 |
| SHH    | 956 | 0.362 |
| NTRK1  | 955 | 0.212 |
| SPTLC1 | 946 | 0.05  |
| HSPB1  | 944 | 0.105 |
| NDRG1  | 943 | 0.031 |
| RET    | 932 | 0.284 |
| FXN    | 931 | 0.046 |

|          |     |       |
|----------|-----|-------|
| NKX2-1   | 925 | 0.165 |
| APP      | 918 | 0.579 |
| LYZ      | 911 | 0.057 |
| ARHGEF6  | 899 | 0.176 |
| DCX      | 899 | 0.198 |
| EDNRA    | 899 | 0.701 |
| GALC     | 899 | 0.236 |
| HLA-DRB1 | 899 | 0.283 |
| IKBKAP   | 899 | 0.481 |
| LRPPRC   | 899 | 0.054 |
| MAPT     | 899 | 0.351 |
| OPHN1    | 899 | 0.134 |
| PAFAH1B1 | 899 | 0.813 |
| SYN1     | 898 | 0.126 |
| SPG7     | 894 | 0.056 |
| PER2     | 892 | 0.151 |
| HFE      | 884 | 0.112 |
| HLA-DQB1 | 864 | 0.092 |
| KRIT1    | 854 | 0.412 |
| HCFC1    | 843 | 0.449 |



|         |     |       |
|---------|-----|-------|
| ACE     | 834 | 0.176 |
| FTL     | 834 | 0.137 |
| CLN3    | 833 | 0.092 |
| SGCE    | 827 | 0.144 |
| ATL1    | 826 | 0.062 |
| RELN    | 825 | 0.359 |
| PSEN2   | 820 | 0.503 |
| WNK1    | 817 | 0.086 |
| HOXA1   | 816 | 0.029 |
| MECP2   | 816 | 0.315 |
| PLP1    | 815 | 0.067 |
| SOD1    | 815 | 0.345 |
| ATN1    | 800 | 0.172 |
| CSTB    | 800 | 0.099 |
| SLC6A8  | 767 | 0.058 |
| PHYH    | 762 | 0.118 |
| SMS     | 756 | 0.143 |
| ARFGEF2 | 755 | 0.104 |
| PARK7   | 753 | 0.25  |
| FOXP2   | 750 | 0.195 |

|         |     |       |
|---------|-----|-------|
| CACNA1A | 724 | 0.317 |
| PDC     | 715 | 0.649 |
| DNM2    | 714 | 0.653 |
| PDCD1   | 712 | 0.264 |
| SCN4A   | 706 | 0.087 |
| COL9A2  | 696 | 0.084 |
| KIF5A   | 696 | 0.217 |
| LITAF   | 690 | 0.061 |
| PAK3    | 683 | 0.334 |
| FLNA    | 663 | 0.592 |
| SLC16A2 | 659 | 0.105 |
| IGBP1   | 655 | 0.518 |
| KCNMA1  | 655 | 0.385 |
| CP      | 651 | 0.516 |
| KCNQ2   | 651 | 0.3   |
| PPT1    | 643 | 0.212 |
| NDUFA9  | 635 | 0.463 |
| L1CAM   | 629 | 0.454 |
| LRRK2   | 605 | 0.251 |
| KCNQ3   | 599 | 0.316 |

|         |     |       |
|---------|-----|-------|
| CST3    | 595 | 0.331 |
| HSPD1   | 591 | 0.746 |
| SOX10   | 591 | 0.491 |
| NEFH    | 589 | 0.168 |
| SLC19A3 | 579 | 0.065 |
| GPR56   | 553 | 0.125 |
| PPP2R2B | 543 | 0.427 |
| COL9A3  | 541 | 0.143 |
| PINK1   | 536 | 0.325 |
| CACNA1S | 535 | 0.395 |
| GLRA1   | 520 | 0.148 |
| PANK2   | 520 | 0.128 |
| SORL1   | 519 | 0.358 |
| CLN8    | 518 | 0.158 |
| HSPB8   | 518 | 0.408 |
| RYR1    | 515 | 0.563 |
| SIX3    | 514 | 0.492 |
| APBB2   | 508 | 0.255 |
| COX15   | 488 | 0.362 |
| GABRG2  | 488 | 0.262 |

|         |     |       |
|---------|-----|-------|
| FGF14   | 484 | 0.312 |
| GCH1    | 478 | 0.71  |
| COL11A1 | 475 | 0.579 |
| SCN1A   | 466 | 0.331 |
| CHRNA2  | 462 | 0.361 |
| HSPG2   | 452 | 0.803 |
| ATP1A3  | 446 | 0.293 |
| CLN6    | 445 | 0.192 |
| ROBO3   | 441 | 0.151 |
| NDUFS3  | 435 | 0.792 |
| NDUFS8  | 432 | 0.708 |
| CLN5    | 429 | 0.188 |
| THBS2   | 420 | 0.625 |
| DCTN1   | 416 | 0.88  |
| PRPH    | 401 | 0.487 |
| CHRNA4  | 396 | 0.521 |
| SACS    | 396 | 0.313 |
| BLMH    | 393 | 0.474 |
| TOR1A   | 393 | 0.646 |
| COL4A1  | 383 | 0.861 |

|         |     |       |
|---------|-----|-------|
| VAPB    | 381 | 0.506 |
| ASPN    | 374 | 0.473 |
| MFN2    | 367 | 0.564 |
| EYA1    | 366 | 0.621 |
| PNKD    | 360 | 0.248 |
| SURF1   | 358 | 0.409 |
| VLDLR   | 358 | 0.717 |
| SCN1B   | 355 | 0.41  |
| EIF2B2  | 353 | 0.365 |
| ITM2B   | 353 | 0.49  |
| MPZ     | 344 | 0.448 |
| MR1     | 340 | 0.321 |
| ARX     | 339 | 0.582 |
| PMP22   | 337 | 0.63  |
| TTF1    | 337 | 0.527 |
| TPP1    | 330 | 0.471 |
| KIF1B   | 329 | 0.709 |
| MCPH1   | 328 | 0.421 |
| SLC12A6 | 327 | 0.524 |
| COLQ    | 326 | 0.384 |

|          |     |       |
|----------|-----|-------|
| PQBP1    | 323 | 0.505 |
| NLGN3    | 321 | 0.452 |
| SPG21    | 318 | 0.462 |
| JPH3     | 312 | 0.529 |
| SDHA     | 312 | 0.848 |
| GAN      | 308 | 0.509 |
| CCM2     | 305 | 0.446 |
| PEX5     | 303 | 0.459 |
| ABCD1    | 301 | 0.597 |
| SCN9A    | 299 | 0.39  |
| TIMM8A   | 299 | 0.484 |
| SCN2A    | 297 | 0.719 |
| SLC25A22 | 296 | 0.133 |
| NIPA1    | 294 | 0.415 |
| SH3TC2   | 294 | 0.376 |
| SPG20    | 294 | 0.612 |
| SNCB     | 290 | 0.53  |
| ATXN1    | 286 | 0.779 |
| SOX3     | 285 | 0.674 |
| ATXN2    | 281 | 0.829 |

|          |     |       |
|----------|-----|-------|
| GSN      | 280 | 0.97  |
| EIF2B1   | 277 | 0.727 |
| EIF2B3   | 277 | 0.383 |
| EIF2B4   | 277 | 0.268 |
| EIF2B5   | 277 | 0.458 |
| SNAP29   | 271 | 0.566 |
| BSCL2    | 267 | 0.719 |
| BCS1L    | 258 | 0.813 |
| ATXN7    | 255 | 0.817 |
| MLC1     | 255 | 0.766 |
| ATXN3    | 254 | 0.884 |
| SPAST    | 254 | 0.653 |
| ARHGEF10 | 252 | 0.444 |
| SETX     | 243 | 0.764 |
| PDHA1    | 238 | 0.778 |
| CHM      | 234 | 0.792 |
| ALS2     | 232 | 0.706 |
| SLC25A19 | 230 | 0.513 |
| NHLRC1   | 227 | 0.569 |
| EPM2A    | 221 | 0.703 |

|          |     |       |
|----------|-----|-------|
| POLG     | 217 | 0.81  |
| TTPA     | 210 | 0.599 |
| ATP1A2   | 196 | 0.785 |
| CILP     | 196 | 0.382 |
| VPS13A   | 193 | 0.567 |
| AMN      | 180 | 0.471 |
| SERPINI1 | 180 | 0.66  |
| ASPM     | 173 | 0.962 |
| NDUFS4   | 172 | 0.851 |
| PRSS12   | 172 | 0.333 |
| GJC2     | 171 | 0.409 |
| KDM5C    | 167 | 0.882 |
| CRBN     | 160 | 0.632 |
| ACSL4    | 0   | 1     |
| ALMS1    | 0   | 1     |
| ARSA     | 0   | 1     |
| ATCAY    | 0   | 1     |
| CDK5RAP2 | 0   | 1     |
| CENPJ    | 0   | 1     |
| CLCN2    | 0   | 1     |



|         |   |   |
|---------|---|---|
| EFHC1   | 0 | 1 |
| FOXRED1 | 0 | 1 |
| FTSJ1   | 0 | 1 |
| GARS    | 0 | 1 |
| GDAP1   | 0 | 1 |
| GPR98   | 0 | 1 |
| LGI1    | 0 | 1 |
| ME2     | 0 | 1 |
| MTMR2   | 0 | 1 |
| NDUFA10 | 0 | 1 |
| NDUFA12 | 0 | 1 |
| NDUFA2  | 0 | 1 |
| NDUFAF2 | 0 | 1 |
| NDUFAF6 | 0 | 1 |
| NDUFS7  | 0 | 1 |
| PEX12   | 0 | 1 |
| SBF2    | 0 | 1 |
| TDP1    | 0 | 1 |
| ZNF81   | 0 | 1 |

#### 16. Genes related to nutritional

| Gene     | Maximum interaction score | Permutation FDR |
|----------|---------------------------|-----------------|
| PPARG    | 999                       | 0.017           |
| POMC     | 996                       | 0.093           |
| PYY      | 995                       | 0.02            |
| UCP1     | 991                       | 0.011           |
| GHRL     | 960                       | 0.085           |
| AGRP     | 958                       | 0.096           |
| NR0B2    | 941                       | 0.174           |
| ADRB2    | 918                       | 0.194           |
| MC4R     | 913                       | 0.141           |
| HTR2A    | 907                       | 0.13            |
| ADRB3    | 899                       | 0.427           |
| UCP3     | 863                       | 0.094           |
| SLC6A14  | 530                       | 0.131           |
| SIM1     | 472                       | 0.421           |
| PPARGC1B | 464                       | 0.555           |
| PCSK1    | 436                       | 0.455           |
| ENPP1    | 386                       | 0.671           |
| SDC3     | 367                       | 0.699           |

#### 17. Genes related to ophthalmological

| Gene    | Maximum interaction score | Permutation FDR |
|---------|---------------------------|-----------------|
| LRP5    | 998                       | 0.024           |
| APOE    | 990                       | 0.114           |
| PLG     | 984                       | 0.09            |
| NDP     | 976                       | 0.022           |
| CYP1B1  | 969                       | 0.119           |
| DRD5    | 961                       | 0.014           |
| TGFBI   | 953                       | 0.087           |
| MYOC    | 947                       | 0.015           |
| SOX2    | 939                       | 0.154           |
| PITX3   | 909                       | 0.032           |
| KRT3    | 904                       | 0.08            |
| GUCY2D  | 899                       | 0.512           |
| PITX2   | 899                       | 0.394           |
| FOXE3   | 899                       | 0.28            |
| TIMP3   | 881                       | 0.093           |
| PIKFYVE | 836                       | 0.148           |
| FTL     | 834                       | 0.137           |
| FOXC1   | 828                       | 0.088           |
| CRX     | 819                       | 0.217           |

|         |     |       |
|---------|-----|-------|
| BEST1   | 815 | 0.081 |
| RDH5    | 801 | 0.075 |
| SLC45A2 | 786 | 0.201 |
| CRYGC   | 768 | 0.066 |
| VCAN    | 760 | 0.403 |
| PAX6    | 760 | 0.48  |
| PHOX2A  | 745 | 0.092 |
| OPTN    | 717 | 0.088 |
| GJA3    | 650 | 0.156 |
| CHST6   | 649 | 0.065 |
| KRT12   | 635 | 0.077 |
| FBN1    | 633 | 0.319 |
| OPN1MW  | 595 | 0.145 |
| CA4     | 567 | 0.142 |
| PRPF8   | 548 | 0.757 |
| CFHR1   | 526 | 0.194 |
| AIPL1   | 518 | 0.258 |
| AIM1    | 516 | 0.197 |
| CFHR3   | 510 | 0.167 |
| ELOVL4  | 502 | 0.073 |

|         |     |       |
|---------|-----|-------|
| FBLN5   | 486 | 0.183 |
| PLEKHA1 | 480 | 0.146 |
| HMCN1   | 473 | 0.115 |
| CNGA3   | 469 | 0.342 |
| OPA3    | 469 | 0.092 |
| RPE65   | 468 | 0.386 |
| EFEMP1  | 456 | 0.408 |
| ABCA4   | 443 | 0.347 |
| KERA    | 438 | 0.204 |
| TULP1   | 430 | 0.494 |
| PDE6B   | 409 | 0.696 |
| TACSTD2 | 405 | 0.386 |
| PRPH    | 401 | 0.487 |
| SAG     | 395 | 0.682 |
| VSX1    | 385 | 0.216 |
| ROM1    | 374 | 0.377 |
| C1QTNF5 | 374 | 0.296 |
| RHO     | 369 | 0.676 |
| OPA1    | 367 | 0.597 |
| RP1     | 348 | 0.673 |

|         |     |       |
|---------|-----|-------|
| CRYBA1  | 348 | 0.479 |
| CRYGD   | 347 | 0.603 |
| LAMB2   | 331 | 0.571 |
| CACNA1F | 324 | 0.557 |
| CYP4V2  | 319 | 0.322 |
| PRPH2   | 305 | 0.585 |
| RGS9    | 291 | 0.523 |
| FSCN2   | 281 | 0.44  |
| IMPDH1  | 281 | 0.856 |
| CRYAA   | 278 | 0.647 |
| CRB1    | 277 | 0.77  |
| CTDP1   | 260 | 0.789 |
| PRPF31  | 260 | 0.897 |
| GUCA1A  | 255 | 0.559 |
| RPGR    | 235 | 0.773 |
| CHM     | 234 | 0.792 |
| COL8A2  | 221 | 0.489 |
| RGS9BP  | 220 | 0.391 |
| POLG    | 217 | 0.81  |
| RP9     | 195 | 0.746 |

|         |     |       |
|---------|-----|-------|
| NYX     | 179 | 0.692 |
| GJA8    | 167 | 0.795 |
| HSF4    | 160 | 0.764 |
| RLBP1   | 0   | 1     |
| CNGB3   | 0   | 1     |
| CERKL   | 0   | 1     |
| KIF21A  | 0   | 1     |
| OPN1LW  | 0   | 1     |
| NHS     | 0   | 1     |
| SPATA7  | 0   | 1     |
| RPGRIP1 | 0   | 1     |

#### 18. Genes related to psychiatric

| Gene   | Maximum interaction score | Permutation FDR |
|--------|---------------------------|-----------------|
| AKT1   | 997                       | 0.221           |
| BDNF   | 992                       | 0.049           |
| COMT   | 984                       | 0.031           |
| SLC6A3 | 963                       | 0.044           |
| DRD5   | 961                       | 0.014           |
| HCRT   | 954                       | 0.081           |
| DTNBP1 | 944                       | 0.077           |

|          |     |       |
|----------|-----|-------|
| CYP2A6   | 917 | 0.209 |
| HTR2A    | 907 | 0.13  |
| DRD3     | 901 | 0.294 |
| DRD4     | 899 | 0.687 |
| MTHFR    | 854 | 0.156 |
| HTT      | 818 | 0.271 |
| PRODH    | 800 | 0.132 |
| DLX2     | 742 | 0.133 |
| SLC6A4   | 722 | 0.319 |
| TPH2     | 685 | 0.234 |
| RTN4R    | 582 | 0.221 |
| CHI3L1   | 563 | 0.06  |
| GABBR2   | 447 | 0.232 |
| DISC1    | 416 | 0.866 |
| CHRNA4   | 396 | 0.521 |
| DAOA     | 384 | 0.448 |
| NLGN3    | 321 | 0.452 |
| DAO      | 279 | 0.598 |
| KIAA0319 | 272 | 0.362 |
| APOL2    | 191 | 0.585 |



|        |     |       |
|--------|-----|-------|
| APOL4  | 191 | 0.549 |
| DYX1C1 | 0   | 1     |

19. Genes related to renal

| Gene   | Maximum interaction score | Permutation FDR |
|--------|---------------------------|-----------------|
| WT1    | 983                       | 0.044           |
| PKD1   | 980                       | 0.02            |
| HNF1B  | 947                       | 0.044           |
| FOXL2  | 929                       | 0.019           |
| AGTR1  | 928                       | 0.094           |
| INSL3  | 923                       | 0.041           |
| AVPR2  | 899                       | 0.416           |
| SCNN1B | 887                       | 0.077           |
| SCNN1G | 878                       | 0.077           |
| REN    | 838                       | 0.239           |
| COL4A5 | 836                       | 0.068           |
| ACE    | 834                       | 0.176           |
| NPHS1  | 832                       | 0.274           |
| CD2AP  | 818                       | 0.372           |
| TRPM6  | 817                       | 0.042           |
| NPHS2  | 815                       | 0.164           |

|          |     |       |
|----------|-----|-------|
| TRPC6    | 800 | 0.254 |
| SLC5A2   | 780 | 0.034 |
| SLC22A12 | 716 | 0.102 |
| SLC3A1   | 714 | 0.12  |
| AGT      | 664 | 0.317 |
| ACTN4    | 657 | 0.631 |
| SLC12A3  | 656 | 0.147 |
| SLC4A4   | 642 | 0.118 |
| CD151    | 628 | 0.256 |
| SLC4A5   | 587 | 0.066 |
| NPHP3    | 563 | 0.104 |
| CACNA1S  | 535 | 0.395 |
| CLDN16   | 510 | 0.364 |
| PKHD1    | 489 | 0.248 |
| NPHP1    | 484 | 0.327 |
| ATP6V0A4 | 480 | 0.418 |
| INVS     | 405 | 0.388 |
| DIAPH2   | 381 | 0.511 |
| SLC7A9   | 358 | 0.299 |
| COL4A3   | 298 | 0.7   |

|        |     |       |
|--------|-----|-------|
| CLCN5  | 296 | 0.656 |
| UMOD   | 272 | 0.687 |
| COL4A4 | 249 | 0.755 |
| IQCB1  | 208 | 0.336 |
| CTNS   | 151 | 0.586 |
| NPHP4  | 0   | 1     |
| ZNF365 | 0   | 1     |

## 20. Genes related to respiratory

| Gene   | Maximum interaction score | Permutation FDR |
|--------|---------------------------|-----------------|
| IFNGR1 | 999                       | 0.017           |
| IFNG   | 997                       | 0.076           |
| MMP1   | 995                       | 0.032           |
| IL12B  | 993                       | 0.093           |
| TNF    | 993                       | 0.301           |
| BDNF   | 992                       | 0.049           |
| ALOX5  | 983                       | 0.043           |
| TLR2   | 982                       | 0.119           |
| CISH   | 968                       | 0.04            |
| CFTR   | 966                       | 0.108           |
| IL13   | 964                       | 0.145           |

|          |     |       |
|----------|-----|-------|
| HMOX1    | 962 | 0.045 |
| CCL2     | 961 | 0.27  |
| TIRAP    | 939 | 0.102 |
| RET      | 932 | 0.284 |
| MUC7     | 927 | 0.012 |
| TGFB1    | 924 | 0.373 |
| ADRB2    | 918 | 0.194 |
| HLA-G    | 912 | 0.076 |
| PLA2G7   | 910 | 0.137 |
| CCL11    | 909 | 0.219 |
| NPSR1    | 909 | 0.097 |
| PTGDR    | 909 | 0.087 |
| EDN3     | 899 | 0.615 |
| MC3R     | 899 | 0.395 |
| MUC5B    | 883 | 0.062 |
| GDNF     | 863 | 0.383 |
| FCGR2A   | 834 | 0.173 |
| ASCL1    | 795 | 0.273 |
| SERPINA1 | 784 | 0.409 |
| SFTPB    | 736 | 0.208 |

|         |     |       |
|---------|-----|-------|
| SP110   | 716 | 0.05  |
| FLCN    | 714 | 0.106 |
| TSC2    | 686 | 0.532 |
| CD209   | 670 | 0.346 |
| TSC1    | 575 | 0.743 |
| SCGB1A1 | 473 | 0.432 |
| HNMT    | 470 | 0.464 |
| SFTPA2  | 417 | 0.341 |
| SLC11A1 | 377 | 0.546 |
| PHF11   | 360 | 0.492 |
| SCGB3A2 | 360 | 0.368 |
| SFTPA1  | 337 | 0.532 |
| PHOX2B  | 327 | 0.732 |
| DNAH5   | 0   | 1     |

## 21. Genes related to skeletal

| Gene   | Maximum interaction score | Permutation FDR |
|--------|---------------------------|-----------------|
| BMPR1B | 999                       | 0.039           |
| NOG    | 998                       | 0.055           |
| BMP2   | 997                       | 0.088           |
| COL2A1 | 990                       | 0.028           |

|        |     |       |
|--------|-----|-------|
| RUNX2  | 989 | 0.08  |
| SOST   | 987 | 0.008 |
| FGFR3  | 983 | 0.099 |
| SCT    | 979 | 0.07  |
| IHH    | 963 | 0.082 |
| GHR    | 959 | 0.118 |
| SHH    | 956 | 0.362 |
| GJA1   | 953 | 0.097 |
| COMP   | 952 | 0.04  |
| TGFB1  | 924 | 0.373 |
| DLL3   | 916 | 0.052 |
| CTSK   | 915 | 0.035 |
| NPR2   | 899 | 0.475 |
| FGFR1  | 899 | 0.393 |
| FGFR2  | 878 | 0.33  |
| EVC    | 871 | 0.019 |
| SOX9   | 847 | 0.367 |
| MSX1   | 804 | 0.264 |
| IRF6   | 800 | 0.044 |
| HOXD13 | 800 | 0.124 |

|         |     |       |
|---------|-----|-------|
| MSX2    | 764 | 0.304 |
| PRG4    | 764 | 0.043 |
| GDF5    | 730 | 0.205 |
| ROR2    | 724 | 0.105 |
| COL9A2  | 696 | 0.084 |
| EVC2    | 694 | 0.055 |
| FLNA    | 663 | 0.592 |
| FBLN1   | 619 | 0.179 |
| HOXD10  | 591 | 0.147 |
| SRA1    | 585 | 0.331 |
| MESP2   | 544 | 0.293 |
| COL9A3  | 541 | 0.143 |
| PAX9    | 527 | 0.429 |
| WISP3   | 488 | 0.136 |
| COL11A1 | 475 | 0.579 |
| GHSR    | 450 | 0.287 |
| TP63    | 433 | 0.744 |
| LMBR1   | 424 | 0.191 |
| THBS2   | 420 | 0.625 |
| MATN3   | 408 | 0.31  |

|         |     |       |
|---------|-----|-------|
| EFNB1   | 385 | 0.685 |
| ASPN    | 374 | 0.473 |
| TBX4    | 358 | 0.282 |
| SLC26A2 | 353 | 0.368 |
| MNX1    | 351 | 0.879 |
| OFD1    | 310 | 0.749 |
| FLNB    | 296 | 0.634 |
| TRAPPC2 | 278 | 0.3   |
| CILP    | 196 | 0.382 |
| DYM     | 0   | 1     |
| LBR     | 0   | 1     |
| SHOX    | 0   | 1     |

## 22. Genes related to unclassified

| Gene  | Maximum interaction score | Permutation FDR |
|-------|---------------------------|-----------------|
| LRP5  | 998                       | 0.024           |
| CFTR  | 966                       | 0.108           |
| ADH1B | 963                       | 0.063           |
| PTEN  | 953                       | 0.26            |
| HTR2A | 907                       | 0.13            |
| FSHR  | 899                       | 0.456           |



|         |     |       |
|---------|-----|-------|
| FGFR2   | 878 | 0.33  |
| GABRA2  | 504 | 0.102 |
| SH3BP2  | 291 | 0.562 |
| PLOD2   | 247 | 0.588 |
| TAS2R16 | 0   | 1     |
| RCBTB1  | 0   | 1     |
| TSPYL1  | 0   | 1     |
