# Supplementary material for: The Use of Protein-Protein Interactions for the Analysis of the Associations between PM2.5 and Some Diseases
Source: Biomed Res Int. 2016 May 8;2016:4895476. doi: 10.1155/2016/4895476 (PMC4875974; doi:10.1155/2016/4895476)
Supplement: Supplementary file 1 — The Supplementary Material consists of three files. In detail, Supplementary Material I lists genes related to 22 OMIM disease classes; Supplementary Material II lists 189 genes modulated by PM2.5; Supplementary Material III lists maximum interaction score and permutation FDR for each disease gene. [file 4895476.f1.zip]

Archive with 3 entries (3 files):
- Supp-I.pdf
- Supp-II.pdf
- Supp-III.pdf
